# Supplementary material for: Antifeedant Effects of Essential Oil, Extracts, and Isolated Sesquiterpenes from Pilgerodendron uviferum (D. Don) Florin Heartwood on Red Clover Borer Hylastinus obscurus (Coleoptera: Curculionidae)
Source: PubMed Central journal article supplement (PMC6099530; doi:10.3390/molecules23061282), 2018-05-27
Supplement: molecules-23-01282-s001.pdf [file molecules-23-01282-s001.pdf]

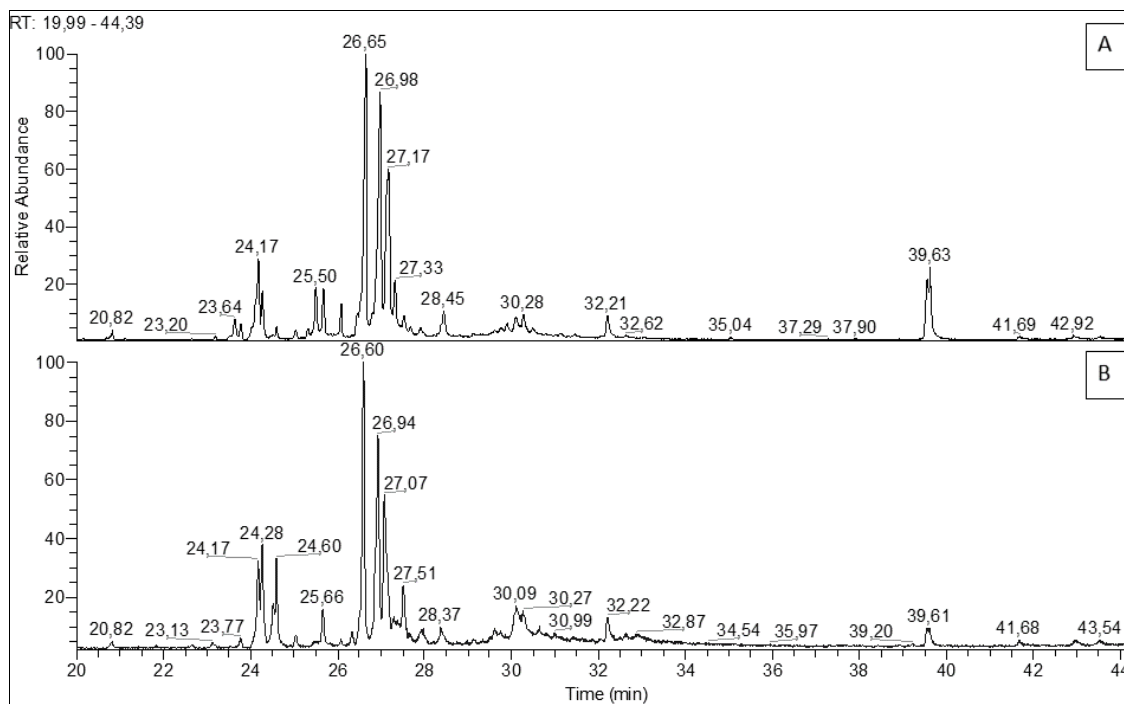

**Figure S1:** Chromatograms of DCME (A) and PEE (B) extracts of *P. wiferum* heartwood obtained by GC-MS analyses.
